# Supplementary material for: Mifamurtide and TAM-like macrophages: effect on proliferation, migration and differentiation of osteosarcoma cells
Source: PubMed Central journal article supplement (PMC7041936; doi:10.18632/oncotarget.27479), 2020-02-18
Supplement: oncotarget-11-687-s001.pdf [file oncotarget-11-687-s001.pdf]

## Mifamurtide and TAM-like macrophages: effect on proliferation, migration and differentiation of osteosarcoma cells

### SUPPLEMENTARY MATERIALS

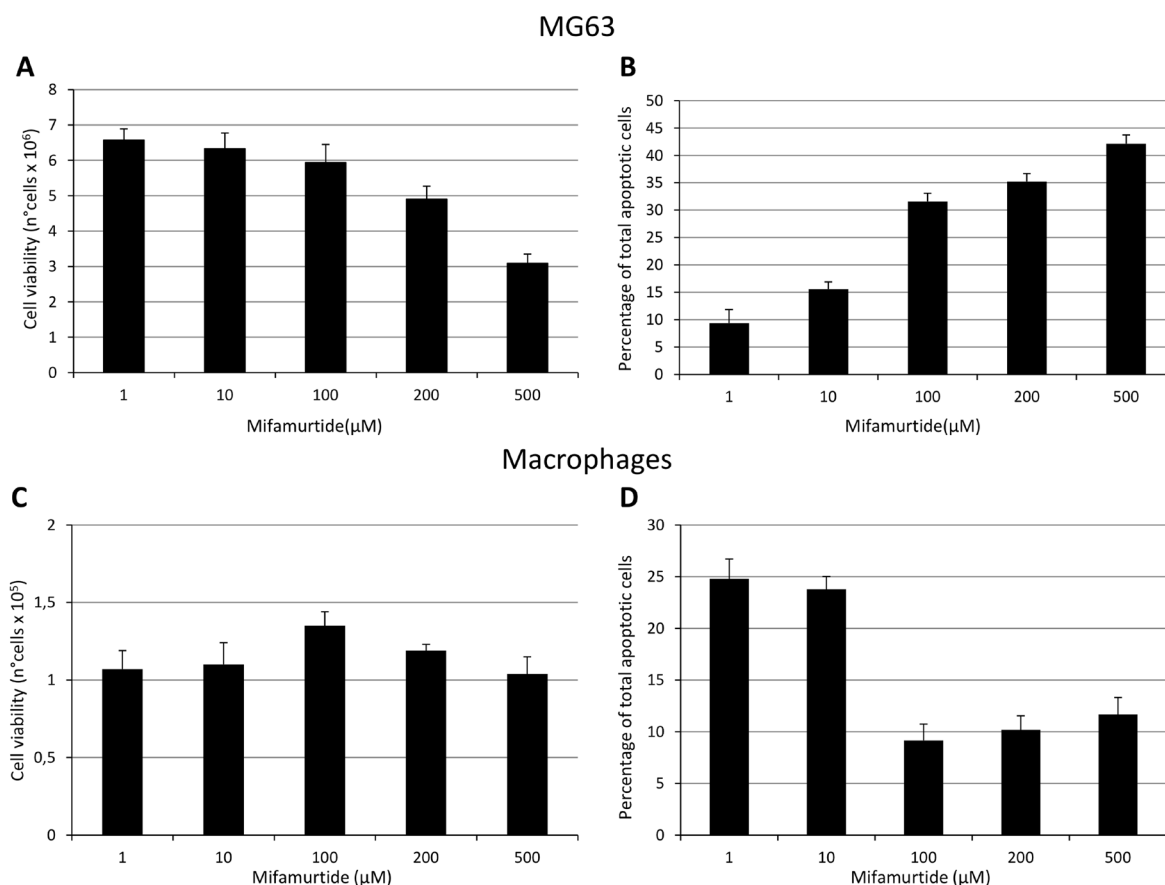

**Supplementary Figure 1: Concentration-related effects of Mifamurtide on MG63 cells and on macrophages viability and apoptosis.** (A, B) MG63 cells Viability and Apoptosis (Annexin-V and PI double-stained) Assay was estimated by a cytofluorimetric assay after treatment with Mifamurtide (1, 10, 100, 200, 500 μM). The histograms show results as cell number per 10<sup>6</sup> (MG63) as mean percentage ± SD of three independent experiments. (C, D) Macrophages Viability and Apoptosis (Annexin-V and PI double-stained) Assay after treatment with Mifamurtide (1, 10, 100, 200, 500 μM). The results are presented as cell number per 10<sup>5</sup> (macrophages) and as the mean percentage ± SD of three independent experiments.
